# Supplementary material
Source: Springer Nature journal article supplement (https://www.springermedizin.de/resource/supplementary/12936_2013_3139_MOESM1_ESM.pdf/9546260)
Supplement: MOESM1 [file 9546260]

Additional File 1

Table S1: Total financial cost and average annual economic cost of the LLIN campaign in Brong Ahafo, Central and Western regions

|                                                   | TOTAL FINANCIAL COST |             |                  |             |                  |             | AVERAGE ANNUAL ECONOMIC COST |             |                  |             |                  |             |
|---------------------------------------------------|----------------------|-------------|------------------|-------------|------------------|-------------|------------------------------|-------------|------------------|-------------|------------------|-------------|
|                                                   | Brong Ahafo          | %           | Central          | %           | Western          | %           | Brong Ahafo                  | %           | Central          | %           | Western          | %           |
| <b>LLINs, Transport &amp; Storage</b>             | <b>5,469,317</b>     | <b>74.5</b> | <b>6,071,091</b> | <b>79.3</b> | <b>8,158,505</b> | <b>82.3</b> | <b>1,933,570</b>             | <b>60.3</b> | <b>2,146,315</b> | <b>64.4</b> | <b>2,885,412</b> | <b>70.3</b> |
| LLINs                                             | 4,993,733            | 68.0        | 5,623,752        | 73.5        | 7,551,223        | 76.1        | 1,765,436                    | 55.0        | 1,988,167        | 59.6        | 2,69,586         | 65.1        |
| Non-LLIN materials                                | 357,351              | 4.9         | 412,228          | 5.4         | 539,160          | 5.4         | 126,334                      | 3.9         | 145,735          | 4.4         | 190,610          | 4.7         |
| Transport & storage                               | 118,233              | 1.6         | 35,112           | 0.5         | 68,122           | 0.7         | 41,799                       | 1.3         | 12,413           | 0.4         | 24,083           | 0.6         |
| <b>Household Registration Phase</b>               | <b>248,698</b>       | <b>3.4</b>  | <b>268,415</b>   | <b>3.5</b>  | <b>260,216</b>   | <b>2.6</b>  | <b>194,985</b>               | <b>6.1</b>  | <b>208,760</b>   | <b>6.3</b>  | <b>202,512</b>   | <b>4.9</b>  |
| Regional planning & training of trainers          | 39,493               | 0.6         | 45,121           | 0.6         | 43,787           | 0.5         | 18,464                       | 0.6         | 21,908           | 0.7         | 21,436           | 0.5         |
| Training of volunteers                            | 38,293               | 0.5         | 40,994           | 0.5         | 47,189           | 0.5         | 26,881                       | 0.8         | 26,373           | 0.8         | 27,132           | 0.7         |
| Registration exercise                             | 96,602               | 1.3         | 109,628          | 1.4         | 110,078          | 1.1         | 108,516                      | 3.4         | 122,764          | 3.7         | 120,870          | 2.9         |
| Supervision                                       | 74,310               | 1.0         | 72,672           | 0.9         | 59,162           | 0.6         | 41,124                       | 1.3         | 37,715           | 1.1         | 33,074           | 0.8         |
| <b>LLIN Distribution (including hang-up)</b>      | <b>400,854</b>       | <b>5.5</b>  | <b>390,301</b>   | <b>5.1</b>  | <b>397,272</b>   | <b>4.0</b>  | <b>447,603</b>               | <b>14.0</b> | <b>459,578</b>   | <b>13.8</b> | <b>465,012</b>   | <b>11.4</b> |
| Logistics training                                | 57,701               | 0.8         | 59,236           | 0.8         | 58,931           | 0.6         | 25,149                       | 0.8         | 25,226           | 0.8         | 25,118           | 0.6         |
| Training of volunteers                            | 116,236              | 1.6         | 139,377          | 1.8         | 120,316          | 1.2         | 69,478                       | 2.2         | 78,792           | 2.4         | 72,821           | 1.8         |
| Hang-Up exercise                                  | -                    | -           | -                | -           | -                | -           | 223,092                      | 7.0         | 252,022          | 7.6         | 256,689          | 6.3         |
| Supervision                                       | 226,917              | 3.1         | 191,688          | 2.5         | 218,025          | 2.2         | 129,884                      | 4.0         | 103,539          | 3.1         | 114,305          | 2.8         |
| <b>Information, Education &amp; Communication</b> | <b>222,225</b>       | <b>3.0</b>  | <b>220,970</b>   | <b>2.9</b>  | <b>180,018</b>   | <b>1.8</b>  | <b>119,581</b>               | <b>3.7</b>  | <b>143,535</b>   | <b>4.3</b>  | <b>97,998</b>    | <b>2.4</b>  |
| Social mobilization                               | 156,192              | 2.1         | 116,634          | 1.5         | 119,569          | 1.2         | 57,262                       | 1.8         | 43,150           | 1.3         | 43,359           | 1.1         |
| Keep-up planning & supervision                    | 18,481               | 0.3         | 17,604           | 0.2         | 13,212           | 0.1         | 18,481                       | 0.6         | 17,604           | 0.5         | 13,212           | 0.3         |
| IEC materials & activities                        | 47,551               | 0.7         | 86,732           | 1.1         | 47,238           | 0.4         | 43,838                       | 1.3         | 82,782           | 2.5         | 41,427           | 1.0         |
| <b>Overheads</b>                                  | <b>443,877</b>       | <b>6.0</b>  | <b>486,554</b>   | <b>6.4</b>  | <b>629,721</b>   | <b>6.3</b>  | <b>159,652</b>               | <b>5.0</b>  | <b>176,457</b>   | <b>5.3</b>  | <b>224,954</b>   | <b>5.5</b>  |
| <b>TOTAL PROVIDER COST</b>                        | <b>6,784,971</b>     |             | <b>7,437,331</b> |             | <b>9,625,721</b> |             | <b>2,855,391</b>             |             | <b>3,134,645</b> |             | <b>3,878,676</b> |             |
| <b>Household-Level Costs</b>                      | <b>554,420</b>       | <b>7.6</b>  | <b>218,133</b>   | <b>2.8</b>  | <b>292,895</b>   | <b>3.0</b>  | <b>351,785</b>               | <b>11.0</b> | <b>200,546</b>   | <b>6.0</b>  | <b>221,594</b>   | <b>5.4</b>  |
| Contribution to volunteers                        | 554,420              | 7.6         | 218,133          | 2.8         | 292,895          | 3.0         | 196,004                      | 6.1         | 77,117           | 2.3         | 103,547          | 2.5         |
| Waiting time                                      | -                    | -           | -                | -           | -                | -           | 155,780                      | 4.9         | 123,429          | 3.7         | 118,047          | 2.9         |
| <b>TOTAL SOCIETAL COST</b>                        | <b>7,339,391</b>     |             | <b>7,655,464</b> |             | <b>9,918,628</b> |             | <b>3,207,176</b>             |             | <b>3,335,191</b> |             | <b>4,100,270</b> |             |
